# Supplementary material
Source: publisher figshare collection journal article supplement (https://acs.figshare.com/ndownloader/files/4449976)
Supplement: Supplementary file 1 [file 4449976]

## **Supplementary Information**

# **Enhancement of hydrogen storage capacity of zeolite-templated carbons by chemical activation**

**Marta Sevilla<sup>a,b</sup>, Nurul Alam<sup>a</sup> and Robert Mokaya<sup>a,\*</sup>**

*<sup>a</sup> School of Chemistry, University of Nottingham, University Park, Nottingham NG7 2RD,  
U. K.*

*<sup>b</sup> Instituto Nacional del Carbón (CSIC), P.O. Box 73, 33080 Oviedo, Spain*

*\*r.mokaya@nottingham.ac.uk*

**Table S1. Textural properties and hydrogen uptake capacity of zeolite templated carbons (ZTC) and their activated derivatives (Ac-ZTC).**

| Sample  | Surface area<br>(m <sup>2</sup> /g) <sup>a</sup> | Increase in<br>surface area<br>(%) <sup>b,c</sup> | Pore volume<br>(cm <sup>3</sup> /g) <sup>d</sup> | Pore size maxima<br>(nm) <sup>e</sup> |
|---------|--------------------------------------------------|---------------------------------------------------|--------------------------------------------------|---------------------------------------|
| ZTC6    | 1084 (792)                                       |                                                   | 0.66 (0.37)                                      | 1.2/2.5                               |
| ZTC7    | 916 (667)                                        |                                                   | 0.57 (0.31)                                      | 1.3/2.5                               |
| ZTC8    | 720 (551)                                        |                                                   | 0.41 (0.26)                                      | 1.2/2.5                               |
| Ac-ZTC6 | 867 (138)                                        | -20(-82)                                          | 0.75 (0.06)                                      | 1.3/3.4                               |
| Ac-ZTC7 | 980 (156)                                        | 7 (-77)                                           | 0.85 (0.07)                                      | 1.3/3.5                               |
| Ac-ZTC8 | 1112 (146)                                       | 40 (54)                                           | 0.91 (0.06)                                      | 1.3/3.4                               |

<sup>a</sup>Values in parenthesis are micropore surface area. <sup>b</sup>Percentage increase in surface area after chemical activation. <sup>c</sup>Values in parenthesis are percentage change in micropore surface area after chemical activation. <sup>d</sup>Values in parenthesis are micropore volume. <sup>e</sup>Maxima of the DFT pore size distribution.

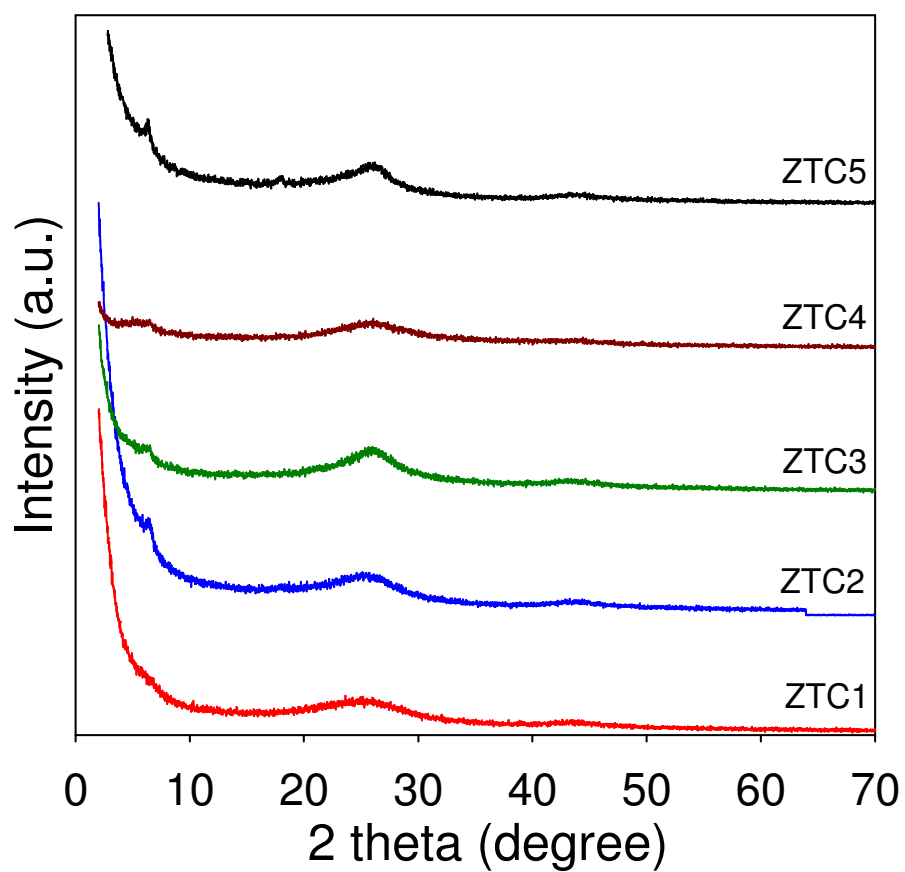

**Supporting Figure S1.** Powder XRD patterns of zeolite-templated carbon.

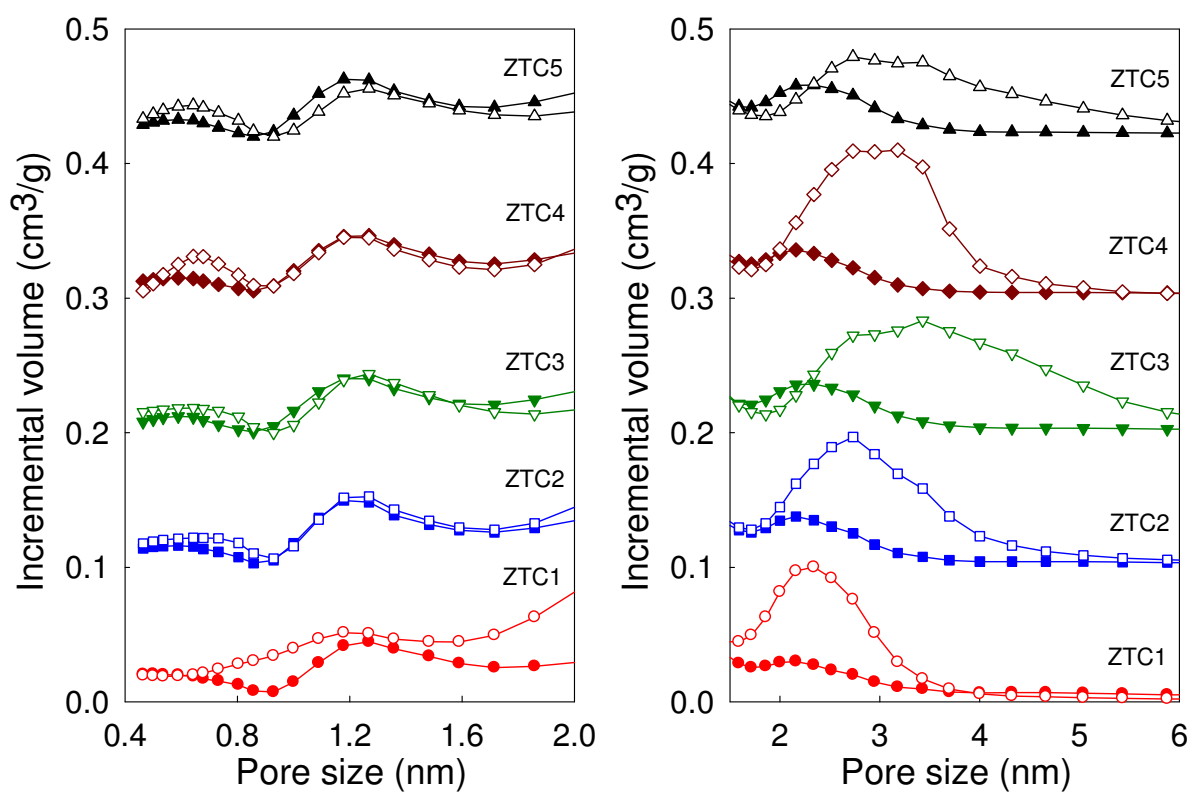

**Supporting Figure S2.** Pore size distribution curves of zeolite-templated carbons before (filled symbols) and after (open symbols) chemical activation with KOH.

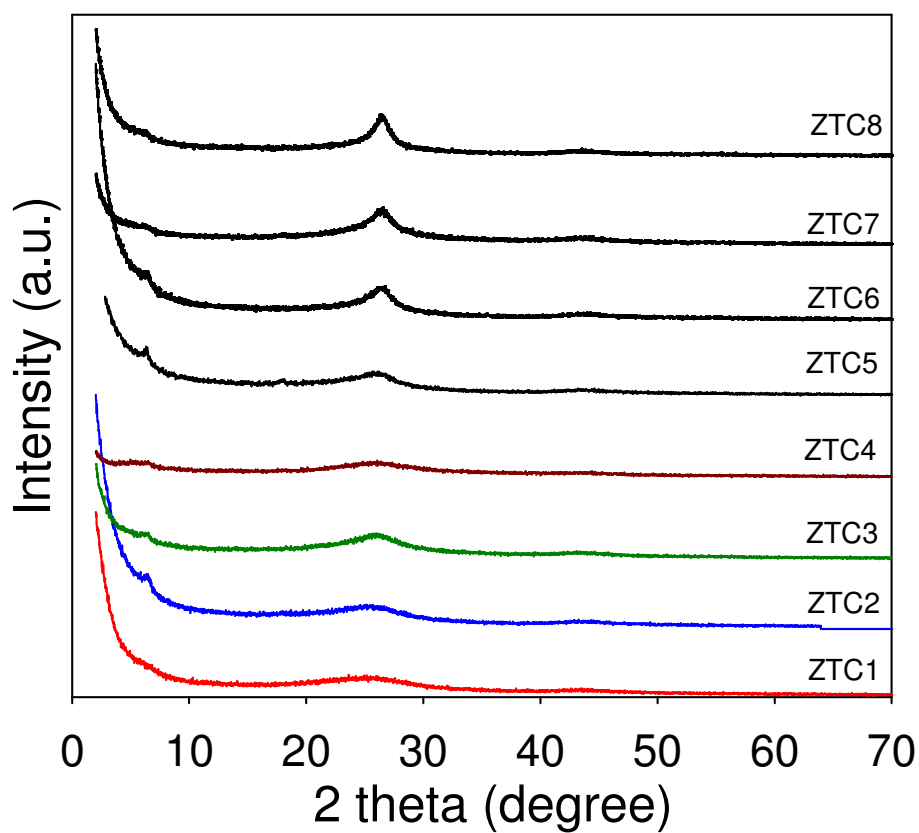

**Supporting Figure S3.** Powder XRD patterns of zeolite-templated carbon showing that samples ZTC6, ZTC7 and ZTC8 (prepared at CVD temperature of 950 and 1000 °C) are relatively more graphitic (according to the peak at  $2\theta = 26^\circ$ , which is ascribed to the (002) diffraction from turbostratic/graphitic carbon)

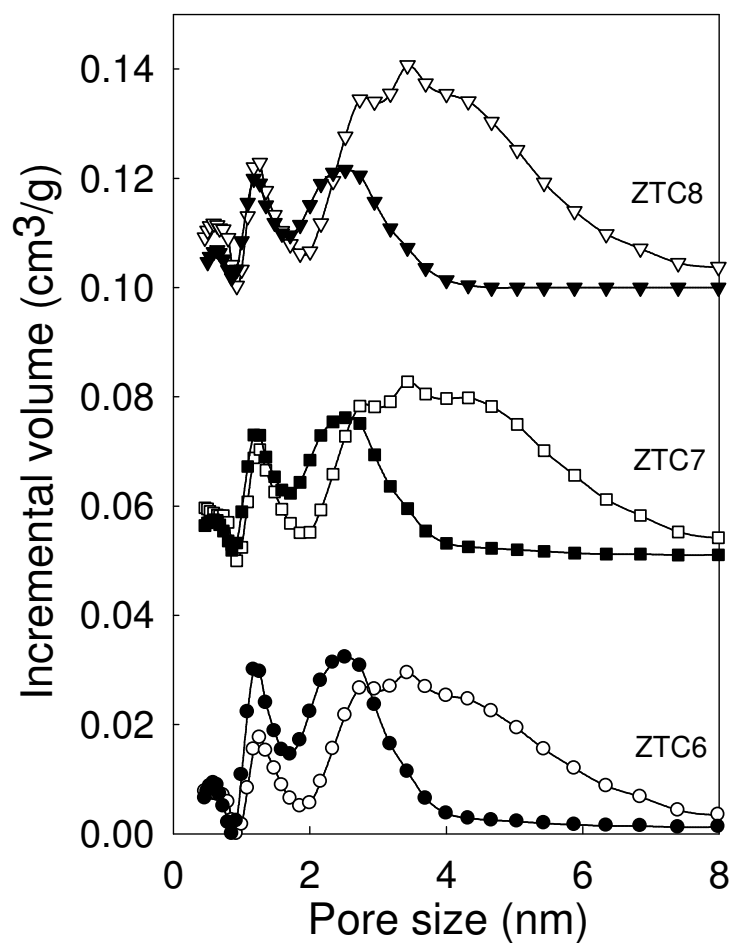

**Supporting Figure S4.** Pore size distribution curves of zeolite-templated carbons with higher levels of graphitisation, before (filled symbols) and after (open symbols) chemical activation with KOH.

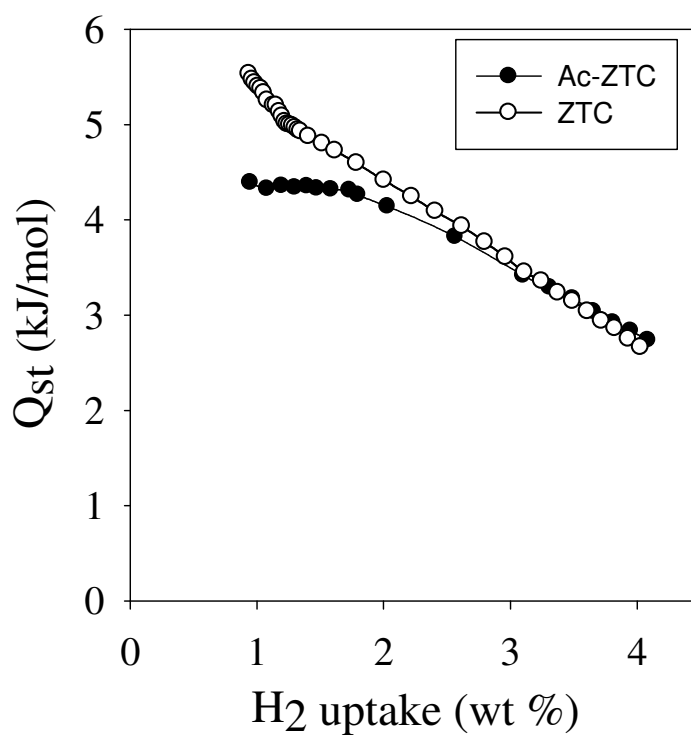

**Supporting Figure S5.** Evolution of the isosteric heat of hydrogen adsorption ( $Q_{st}$ ) as a function of hydrogen uptake of zeolite-templated carbon before (○) and after (●) chemical activation with KOH.

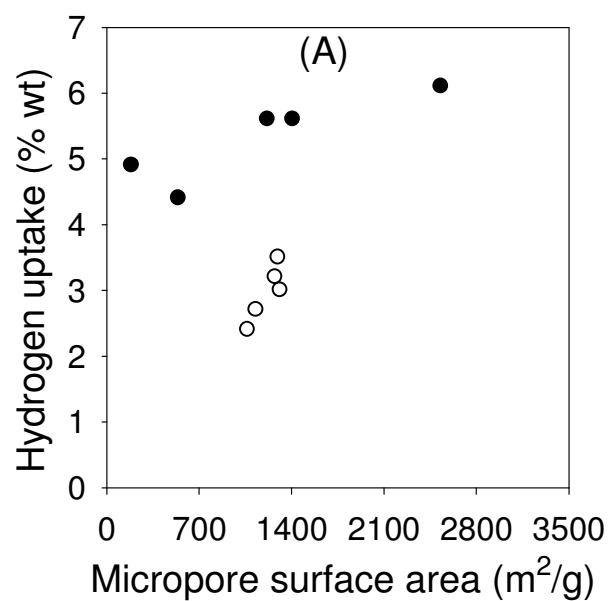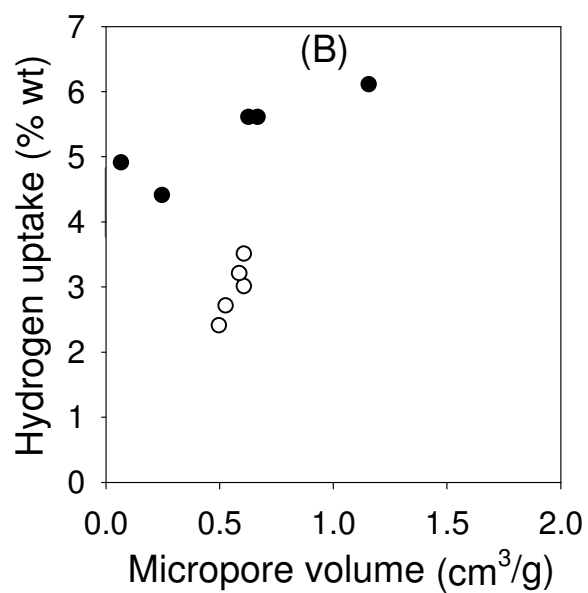

**Supporting Figure S6.** Plot of hydrogen storage capacity as a function of (A) micropore surface area or (B) micropore volume of zeolite-templated carbons before (O) and after (●) chemical activation with KOH.
